1 Nitric oxide and coral bleaching: is peroxynitrite generation required for  
2 symbiosis collapse?

3

4 Authors: Thomas D. Hawkins, Simon K. Davy\*

5

6 Affiliations: School of Biological Sciences, Victoria University of Wellington,  
7 Wellington, New Zealand.

8 \* Corresponding author: [simon.davy@vuw.ac.nz](mailto:simon.davy@vuw.ac.nz).

9

10

11 **Summary**

12

13 The temperature-induced collapse ("bleaching") of the coral-dinoflagellate symbiosis  
14 is hypothesised to result from symbiont oxidative stress and a subsequent host innate  
15 immune-like response. This includes the production of nitric oxide (NO), which is  
16 involved in numerous microbial symbioses. Much of NO's cytotoxicity has been  
17 attributed to its conversion, in the presence of superoxide ( $O_2^-$ ), to highly reactive  
18 peroxynitrite ( $ONOO^-$ ). However,  $ONOO^-$  generation has yet to be observed in either  
19 a lower invertebrate or intracellular mutualism. Using confocal laser scanning  
20 microscopy with the fluorescent  $ONOO^-$  indicator aminophenyl fluorescein (APF), we  
21 observed strong evidence that  $ONOO^-$  is generated in symbiotic *Aiptasia pulchella*  
22 under conditions known to induce thermal bleaching. However, a role for  $ONOO^-$  in  
23 bleaching remains unclear as treatment with a peroxynitrite scavenger had no  
24 significant effect on thermal bleaching. Therefore, while  $ONOO^-$  may have a potential  
25 for cytotoxicity, *in vivo* levels of the compound may be insufficient to affect  
26 bleaching.

27

28 **Keywords:** Reactive nitrogen species, endosymbiosis, oxidative stress, *Symbiodinium*,  
29 cnidarian-dinoflagellate symbiosis, innate immunity.

30

31

32 **Introduction**

33

34 Microbial symbioses are ubiquitous in the natural world and sustain some of the most  
35 diverse ecosystems on Earth. Among the most ecologically important associations are  
36 those between reef corals (Cnidaria) and photosynthetic dinoflagellates. These algal  
37 symbionts (genus *Symbiodinium*) provide the host with energy in exchange for  
38 nutrients that are typically at low concentrations in the surrounding seawater (Davy et  
39 al., 2012). The association underpins the existence of coral reefs but is being placed  
40 under increasing strain by recent climatic changes, particularly rising sea surface  
41 temperatures (Weis, 2008). It has long been known that excessive heating of corals  
42 can result in the loss of their symbiotic algae (a process known as "bleaching"), yet  
43 we still know little about the physiological events underpinning this symbiotic  
44 collapse (Weis, 2008; Davy et al., 2012).

45

46 Coral bleaching has been linked to the overproduction of reactive oxygen species  
47 (ROS; Lesser, 2006). Often associated with photosynthetic dysfunction, ROS have a  
48 well-known capacity for cellular damage (Lesser, 2006), but at low concentrations  
49 they also act as signalling compounds (Winterbourn, 2008). It has been hypothesised  
50 that ROS leakage from photosynthetically compromised symbionts stimulates an  
51 innate immune-like pathway resulting in host nitric oxide (NO) synthesis (Perez and  
52 Weis, 2006; Weis, 2008), but very few data exist regarding ROS and cnidarian innate  
53 immunity. NO is a ubiquitous signalling compound implicated in the regulation of  
54 numerous microbial endosymbioses (Wang and Ruby, 2011). When produced  
55 alongside ROS (specifically superoxide,  $O_2^-$ ), however, NO can convert to highly  
56 reactive peroxynitrite ( $ONOO^-$ ), which is much more toxic and has a capacity to  
57 irreversibly damage mitochondria, antioxidant enzymes, DNA, and lipid membranes  
58 (Pacher et al., 2007). In fact, the reaction between NO and  $O_2^-$  occurs faster than that  
59 of  $O_2^-$  with superoxide dismutase, thus the formation of  $ONOO^-$  is regarded as  
60 inevitable when NO and  $O_2^-$  are generated simultaneously (Pacher et al., 2007). The  
61 likelihood of its generation under thermal stress has therefore led to  $ONOO^-$  being  
62 proposed as the effector of NO-mediated cnidarian bleaching (Perez and Weis, 2006;  
63 Weis, 2008).

64

65 Using the model cnidarian *Aiptasia pulchella*, this investigation sought to test the  
66 hypothesis that cnidarian bleaching is dependent on NO's conversion to ONOO<sup>-</sup>  
67 during thermal stress. Filling this gap in our knowledge is important if we are to better  
68 understand the cellular basis of coral bleaching and the breakdown of intracellular  
69 mutualisms in general.

70

## 71 **Materials and Methods**

72

73 Symbiotic specimens of *Aiptasia pulchella* were maintained in glass bowls under a  
74 12-h light:12-h dark cycle (80-100  $\mu\text{mol photons m}^{-2} \text{ s}^{-1}$  provided by cool white  
75 fluorescent tubing; OSRAM DULUX L 36W 4000 K) at a temperature of 26°C, and  
76 fed twice weekly with freshly hatched *Artemia* sp. nauplii. Prior to treatment,  
77 anemones were starved for 48 h.

78

79 *Experimental induction of ONOO<sup>-</sup> in Aiptasia pulchella and its fluorometric*  
80 *assessment.*

81

82 Peroxynitrite was detected using the fluorescent indicator aminophenyl fluorescein  
83 (APF; Molecular Probes, Eugene, OR, USA). APF is specific for highly reactive  
84 species and detects, alongside peroxynitrite, hydroxyl (OH<sup>•</sup>) and hypochlorite (OCl<sup>-</sup>)  
85 radicals. By using specific scavengers of ONOO<sup>-</sup> and NO, however, one can  
86 determine the extent to which APF fluorescence is ONOO<sup>-</sup>-dependent. The suitability  
87 of APF was determined by preparing 100  $\mu\text{l}$  solutions of 10  $\mu\text{M}$  APF in 'anemone  
88 relaxing solution' (50% 0.22- $\mu\text{m}$  filtered seawater (FSW), 50% 0.37 M MgCl<sub>2</sub>) with  
89 and without 2 mM urate (Sigma-Aldrich, Auckland, New Zealand), a peroxynitrite  
90 scavenger that has been employed successfully in fluorescence-based assays (Tewari  
91 et al., 2013). The peroxynitrite donor 3-morpholinosydnonimine (SIN-1; Invitrogen,  
92 Auckland, New Zealand), which generates ONOO<sup>-</sup> through the simultaneous release  
93 of NO and O<sub>2</sub><sup>-</sup>, was then added (0 - 1 mM final SIN-1 concentration). APF  
94 fluorescence (ex: 490 nm, em: 515 nm) was monitored over 2 h using a fluorescent  
95 microplate reader (Enspire<sup>®</sup> 2300, Perkin-Elmer, Waltham, MA, USA). To determine  
96 whether the effects of urate on APF signal were truly due to scavenging of ONOO<sup>-</sup>  
97 (rather than quenching of APF fluorescence), the SIN-1/APF incubation was repeated  
98 with 2 mM urate added 30 min after SIN-1.

100 The ability of APF to detect peroxynitrite *in vivo* was assessed by incubating  
101 individual anemones (n = 6) for 60 min with 10  $\mu$ M APF in a) relaxing solution only,  
102 b) 1 mM SIN-1, c) 1 mM SIN-1 + 2 mM urate, d) 1 mM SIN-1 + 1 mM of the NO  
103 scavenger 2-(4-carboxyphenyl)-4,5-dihydro-4,4,5,5-tetramethyl-1H-imidazolyl-1-  
104 oxy-3-oxide (cPTIO; Life Technologies, Auckland, New Zealand).

105

106 Endogenous production of ONOO<sup>-</sup> by *A. pulchella* was investigated using the high  
107 temperature shock (HTS) method. Briefly, anemones (2-3 mm oral disc diameter) in  
108 FSW (n = 6 per treatment in individual glass beakers) were transferred to a 26°C  
109 water bath under 12-h light: 12-h dark cycle, (light: 70-90  $\mu$ mol photons m<sup>-2</sup> s<sup>-1</sup>  
110 provided by a light-emitting diode (LED) light bankl 20 RoHS 5 W 6400 K) and  
111 allowed to acclimate for 48 h (fluorometric assessments of symbiont photosynthesis  
112 [see below] were conducted to ensure stability prior to treatment). Temperature was  
113 then increased (over < 1 h) to 33°C or kept constant at 26°C (control) and anemones  
114 were exposed to these conditions for 24 h. Some additional anemones (n = 6 per  
115 treatment) were HTS-treated in the presence of 2 mM urate or 1 mM cPTIO.

116

117 To quantify ONOO<sup>-</sup> in live *A. pulchella*, the FSW of experimental anemones was  
118 replaced with 10  $\mu$ M APF in relaxing solution and anemones were incubated in the  
119 dark for 60 min. Individual anemones were transferred to glass-bottom dishes  
120 (MatTek Corporation, Ashland, MA, USA) and immobilised with 1% (w/v) low-  
121 melting agarose in relaxing solution, boiled and cooled to ca. 28°C. They were then  
122 visualised using an Olympus Fluoview FV-1000 inverted confocal LSM (Olympus,  
123 Center Valley, PA, USA) and  $\times$ 40 0.9 NA water immersion lens. A 473 nm laser was  
124 used to excite APF, the fluorescence of which was measured at 510-530 nm.  
125 Symbiont chlorophyll autofluorescence was detected using 635 nm excitation and a  
126 655-755 nm emission filter. Fifteen images in the z-plane were acquired for three  
127 tentacles of each replicate anemone and ONOO<sup>-</sup>-dependent fluorescence was  
128 quantified by measuring the mean 510-530 nm fluorescence intensity of tentacle  
129 gastrodermis using ImageJ software (National Institutes of Health, Bethesda, USA).  
130 Unstained anemones were processed to control for tissue autofluorescence and laser  
131 intensity / LSM image acquisition settings remained unchanged throughout. Any non-

132 fluorescing anemones were incubated for 30 min with 1 mM SIN-1 to confirm  
133 successful loading of APF.

134

135 *Examining the role of ONOO<sup>-</sup> in the thermal bleaching of Aiptasia pulchella.*

136

137 The role of ONOO<sup>-</sup> in temperature-induced bleaching was investigated by incubating  
138 *A. pulchella* (n = 5 in individual glass beakers) for 24 h at 26°C in FSW containing 1  
139 mM SIN-1 with and without 2 mM urate. In addition, six replicate anemones were  
140 HTS-treated with and without 2 mM urate. After 24 h exposure to high temperature or  
141 SIN-1 / urate, anemones were returned to control conditions for a further 24 h (to  
142 allow time for bleaching) and then processed for symbiont density assays as described  
143 below.

144

145 *Assessments of symbiont photosystem II fluorescence and host bleaching.*

146

147 Fluorescence yields of photosystem II (PSII) were monitored regularly (midday and  
148 30 min after lights-off) using pulse amplitude modulation fluorometry (Diving-PAM,  
149 Walz, Effeltrich, Germany). Symbiont densities were determined as follows. Whole  
150 anemones were homogenised using a tissue grinder in a small volume of buffer (50  
151 mM potassium phosphate, pH 7.8, 1 mM EDTA). An aliquot was removed for  
152 haemocytometer counts (at least 6 per sample; Improved Neubauer, Boeco, Germany)  
153 and the remainder was centrifuged (16000 × g for 20 min) and analysed for soluble  
154 protein content (Bradford assay). Changes in symbiont density relative to host soluble  
155 protein ("% symbiont loss") after 48 h were calculated relative to mean pre-treatment  
156 (t = 0) values.

157

158 *Statistical analysis.*

159

160 Data analysis was carried out using PASW Statistics 18.0 (IBM, Armonk, NY, USA).  
161 Where appropriate, data were analysed using repeated measures analysis of variance  
162 (RMANOVA). RMANOVA reports represent time × treatment interactions. All other  
163 analyses were carried out using one-way ANOVA. In all cases data were examined  
164 for normality and transformed where necessary.

165

166 **Results and Discussion**

167

168 *Detection of ONOO<sup>-</sup> in symbiotic Aiptasia pulchella using aminophenyl fluorescein*  
169 *(APF).*

170

171 Aminophenyl fluorescein fluorescence (515 nm) successfully responded to SIN-1-  
172 derived peroxynitrite in a dose-dependent manner (Fig. S1A). Addition of the ONOO<sup>-</sup>  
173 scavenger urate (2 mM) prevented this increase, and adding urate after 30 min  
174 confirmed that this was due to ONOO<sup>-</sup>-scavenging rather than quenching of  
175 fluorescence (Fig S1B). The effects of SIN-1 and urate on APF fluorescence *in vitro*  
176 are shown in electronic supplementary Figure S1.

177

178 Incubation of APF-loaded *A. pulchella* with the peroxynitrite donor SIN-1 resulted in  
179 significant increases in tissue 510-530 nm fluorescence (one-way ANOVA,  $F_{3, 20} =$   
180  $59.753$ ,  $p < 0.001$ , Fig. 1A) that were absent in the presence of 2 mM urate or 1 mM  
181 cPTIO (Fig. 1A). HTS treatment of *A. pulchella* also induced increases (one-way  
182 ANOVA,  $F_{3, 19} = 14.679$ ,  $p < 0.001$ ), which were absent in the presence of urate or  
183 cPTIO (Fig. 1B). The declines in fluorescence intensity when anemones were treated  
184 with scavengers either of ONOO<sup>-</sup> itself (urate) or its precursor NO (cPTIO) confirm  
185 that APF signal in *A. pulchella* was an accurate reflection of ONOO<sup>-</sup> generation rather  
186 than the dye's interactions with other highly reactive compounds.

187

188 The generation of peroxynitrite (ONOO<sup>-</sup>) has been proposed as a significant step in  
189 the cellular cascade underpinning coral bleaching (Perez and Weis, 2006; Weis, 2008)  
190 and this study provides strong evidence that ONOO<sup>-</sup> generation occurs in thermally  
191 stressed cnidarians. To the authors' knowledge, it also represents the first observation  
192 of ONOO<sup>-</sup> in either a lower invertebrate (e.g. Porifera, Cnidaria, or Ctenophora) or an  
193 intracellular mutualism.

194

195 *Involvement of peroxynitrite in thermal photoinhibition and bleaching.*

196

197 The addition of urate (2 mM) significantly alleviated declines in PSII fluorescence  
198 yield (RMANOVA,  $F_{8, 60} = 12.491$ ,  $p < 0.001$ , Fig. 2A). Peroxynitrite strongly  
199 inhibits mechanisms of electron transport (Pacher et al., 2007) and this presumably

200 includes the components of photosynthesis within symbionts' chloroplasts. As we  
201 know very little about the role of reactive nitrogen species in microalgal  
202 photoinhibition, this is an attractive area for future work.

203

204 Peroxynitrite can be cytotoxic to the host in numerous ways (see Pacher et al., 2007  
205 for review) but, in the light of recent investigations (e.g. Dunn et al., 2012), its  
206 interactions with cnidarian host mitochondria may be most important. Differences in  
207 the reactivity of NO and O<sub>2</sub><sup>-</sup> and their potential for diffusion mean that peroxynitrite  
208 generation occurs primarily at the sites of O<sub>2</sub><sup>-</sup> production (Pacher et al., 2007), the  
209 most significant of which (in the host at least) is the inner membrane of mitochondria  
210 (Lesser, 2006). Current research is linking mitochondrial dysfunction and the  
211 associated apoptotic pathways to cnidarian bleaching (Dunn et al., 2012) and as noted  
212 above, ONOO<sup>-</sup> is a potent inhibitor of mitochondrial electron transport. Whether this  
213 occurs at *in vivo* ONOO<sup>-</sup> concentrations has been the subject of debate (Pacher et al.,  
214 2007), however, and we still know little about ONOO<sup>-</sup> generation beyond mammals.  
215 For example, ONOO<sup>-</sup>'s extremely high reactivity and relatively short half-life in  
216 biological systems (Lesser, 2006; Pacher et al., 2007) could very well limit its  
217 capacity for diffusion and thus the number of potential target molecules. In this study  
218 the peroxynitrite donor SIN-1 (1 mM in FSW) induced significant bleaching of *A.*  
219 *pulchella* at control temperatures (one-way ANOVA, F<sub>4, 27</sub> = 20.94, p < 0.001, Fig  
220 2B; Tukey HSD *post-hoc* vs. "control" p = 0.006) and the ONOO<sup>-</sup> scavenger urate  
221 restored levels of symbiont loss to those of the controls (Tukey HSD *post-hoc* vs.  
222 "control" p = 0.365). It would appear, therefore, that addition of ONOO<sup>-</sup> to *A.*  
223 *pulchella* can stimulate bleaching. This is not entirely surprising, as a bolus dose of an  
224 NO and O<sub>2</sub><sup>-</sup> donor would be expected to induce significant physiological stress  
225 (Lesser, 2006; Weis, 2008). However, there was no significant effect of the ONOO<sup>-</sup>  
226 scavenger urate on thermal bleaching intensity (Tukey HSD *post-hoc* vs. "HTS", p >  
227 0.999), and this was not due to heat-induced degradation of the scavenger; application  
228 to APF/SIN-1 solutions of FSW/urate pre-heated to 33°C for 24 h strongly inhibited  
229 APF fluorescence (Fig. S1C). Together, these findings suggest that while ONOO<sup>-</sup> has  
230 a bleaching-inducing capacity, either the levels of ONOO<sup>-</sup> generated *in vivo* are not  
231 sufficient to influence symbiont loss, or alternative pathways (perhaps involving ROS  
232 or NO directly) are more critical.

233



234 In conclusion, we propose that any mediation of temperature-induced cnidarian  
235 bleaching by nitric oxide occurs independently of its conversion to peroxynitrite. NO  
236 has the capacity to directly influence the cell death pathways implicated in bleaching  
237 (Snyder et al., 2009) so ONOO<sup>-</sup> generation may be unnecessary in this regard. The  
238 situation may of course be different in reef corals undergoing bleaching in the field,  
239 where light intensities greater than those employed in the present study could  
240 exaggerate NO / ROS synthesis in both host and symbiont. In any case, investigating  
241 where in the symbiosis ONOO<sup>-</sup> is produced, and how such a potent radical can have  
242 such modest effects during temperature stress are important subjects for future study.  
243

#### 244 **Acknowledgements**

245  
246 The authors thank Dr. Paul Fisher, Sushila Pillai, and Daniel Logan for technical  
247 assistance, and all members of the Davy Lab for their positive input. We also wish to  
248 thank two anonymous reviewers whose comments and suggestions greatly improved  
249 the manuscript.  
250

#### 251 **Funding**

252  
253 This work was supported by Victoria University of Wellington (funding to S.K.D)  
254 and Wellington Botanical Society grants (awarded to T.D.H). This research fulfils  
255 part of the requirements for a PhD supported by a Commonwealth Scholarship  
256 awarded to T.D.H.  
257

#### 258 **References**

- 259  
260 **Davy, S. K., Allemand, D. and Weis, V. M.** (2012). The cell biology of cnidarian-  
261 dinoflagellate symbiosis. *Microbiology and Molecular Biology Reviews* **76**, 229-  
262 261.  
263 **Dunn, S. R., Pernice, M., Green, K., Hoegh-Guldberg, O. and Dove, S. G.** (2012).  
264 Thermal stress promotes host mitochondrial degradation in symbiotic  
265 cnidarians: Are the batteries of the reef going to run out? *PLoS ONE* **7**, e39024.  
266 **Lesser, M. P.** (2006). Oxidative stress in marine environments. *Annual Reviews of*  
267 *Physiology* **68**, 253-278.  
268 **Pacher, P., Beckman, J. S. and Liaudet, L.** (2007). Nitric oxide and peroxynitrite  
269 in health and disease. *Physiological Reviews* **87**, 315-424.

270 **Perez, S. and Weis, V. M.** (2006). Nitric oxide and cnidarian bleaching: An  
271 eviction notice mediates breakdown of a symbiosis. *Journal of Experimental*  
272 *Biology* **209**, 2804-2810.  
273 **Snyder, C. M., Shroff, E. H., Liu, J. and Chandel, N. S.** (2009). Nitric oxide  
274 induces cell death by regulating anti-apoptotic Bcl-2 family members. *PLoS ONE*  
275 **4**, e7059.  
276 **Tewari, R., Prommer, J. and Watanabe, M.** (2013). Endogenous nitric oxide  
277 generation in protoplast chloroplasts. *Plant Cell Rep* **32**, 31-44.  
278 **Wang, Y. L. and Ruby, E. G.** (2011). The roles of NO in microbial symbioses.  
279 *Cellular Microbiology* **13**, 518-526.  
280 **Weis, V. M.** (2008). Cellular mechanisms of cnidarian bleaching: Stress causes  
281 the collapse of symbiosis. *Journal of Experimental Biology* **211**, 3059-3066.  
282 **Winterbourn, C. C.** (2008). Reconciling the chemistry and biology of reactive  
283 oxygen species. *Nature Chemical Biology* **4**, 278-286.  
284  
285  
286

287 **Figure Legends**

288 **Figure 1. Detection of peroxynitrite (ONOO<sup>-</sup>) in live *Aiptasia pulchella*.**

289 Fluorescence intensities of anemone gastrodermis loaded with 10  $\mu$ M aminophenyl  
290 fluorescein (APF) and (A) incubated with and without 1 mM of the ONOO<sup>-</sup> donor  
291 SIN-1, 2 mM of the ONOO<sup>-</sup> scavenger urate, or 1 mM of the NO scavenger cPTIO, or  
292 (B) exposed to high temperature stress (HTS) with and without 2 mM urate or 1 mM  
293 cPTIO. Values in both panels are means  $\pm$  SE (n = 6) and asterisks denote significant  
294 differences relative to the control group (\* p < 0.05, \*\* p < 0.01, \*\*\* p < 0.001). C)  
295 Confocal LSM micrographs of anemone tentacles exposed to control conditions, HTS,  
296 HTS + 2 mM urate, and HTS + 1 mM cPTIO. Green indicates APF fluorescence,  
297 symbiont chlorophyll autofluorescence is labelled red. Scale bar: 100  $\mu$ m.

298

299 **Figure 2. Involvement of peroxynitrite (ONOO<sup>-</sup>) in temperature-induced**  
300 **photoinhibition and bleaching in *Aiptasia pulchella*.** A) Quantum yields of PSII

301 over 48 h. Shaded areas represent periods of darkness and the dotted line indicates the  
302 time at which anemones were returned to control (26°C) conditions (from 33°C). B)  
303 Percentage bleaching of anemones treated for 24 h either with 1 mM of the ONOO<sup>-</sup>  
304 donor SIN-1 or exposed to high temperature stress (HTS - 33°C), both treatments  
305 with and without 2 mM urate. Treatments lasted for 24 h before anemones were  
306 returned to control conditions. Values in both panels are means  $\pm$  SE (n = 6 for  
307 controls and HTS  $\pm$  urate, n = 5 for SIN-1  $\pm$  urate) and asterisks denote significant  
308 differences relative to the control group (\*\* p < 0.01, \*\*\* p < 0.001).

309

310 **Figure S1. The suitability of aminophenyl fluorescein (APF) for detection of**  
311 **peroxynitrite (ONOO<sup>-</sup>).** A) Fluorescence kinetics after addition of various

312 concentrations of the ONOO<sup>-</sup> donor SIN-1 to APF (10  $\mu$ M in relaxing solution - see  
313 text). B) Fluorescence kinetics of APF after addition of 1 mM SIN-1 in the presence  
314 or absence of 2 mM urate (a peroxynitrite scavenger). The urate was added 30 min  
315 after SIN-1, such that previously activated APF remained fluorescent. C)  
316 Fluorescence kinetics of APF after addition of 1 mM SIN-1 in the presence or absence  
317 of 2 mM freshly prepared or heat-treated urate. Values are means  $\pm$  SE (n = 4  
318 independent experiments).



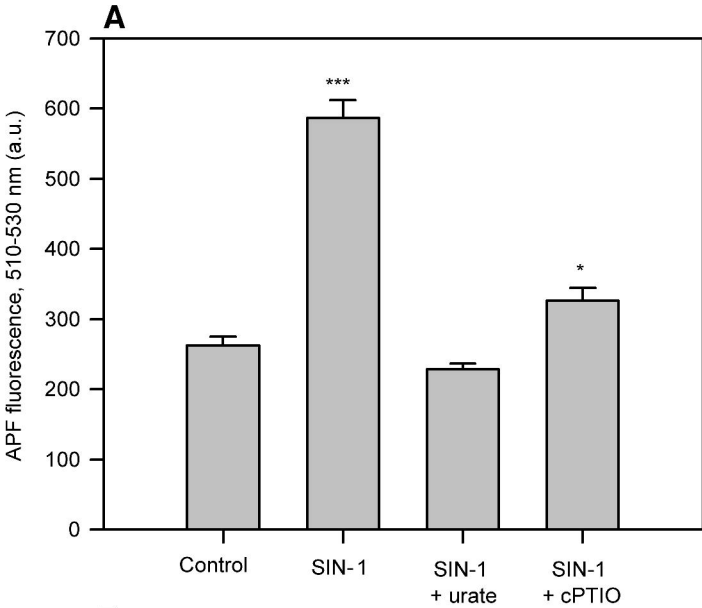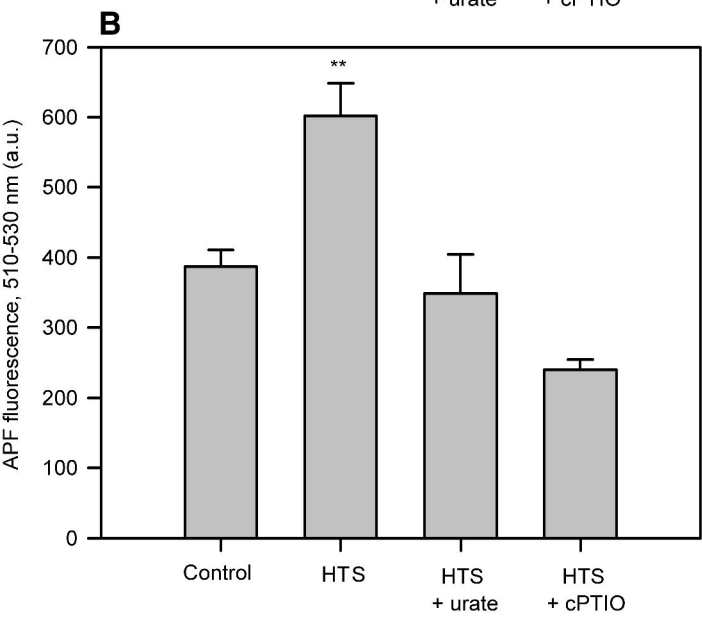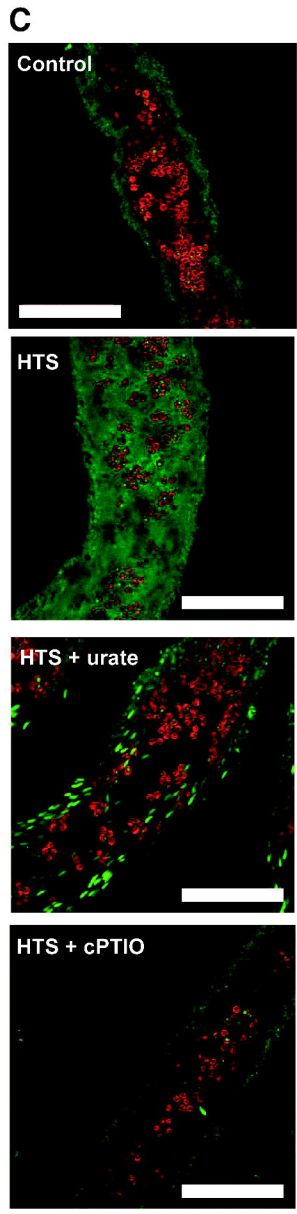

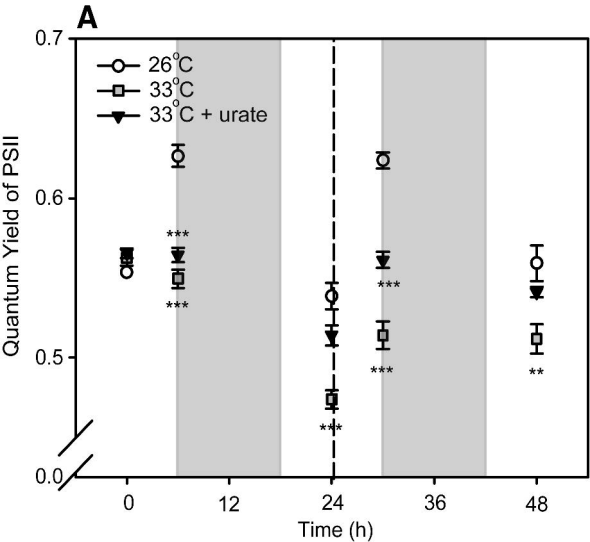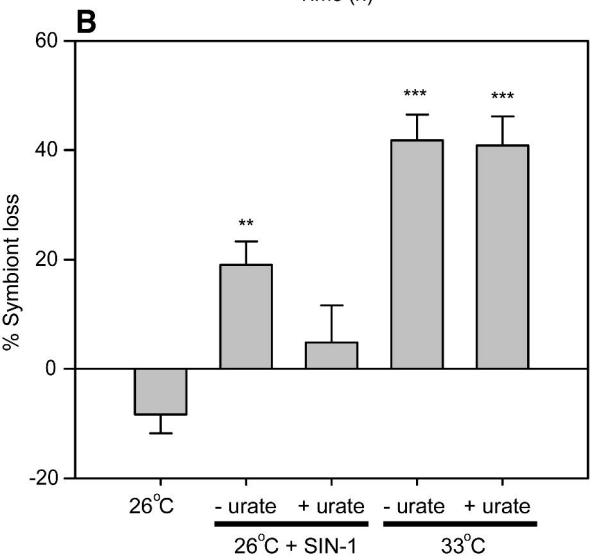

Source: https://cob.silverchair.com/jeb/article-pdf/doi/10.1242/jeb.087510/2037038/jeb_087510.pdf
